# Supplementary material
Source: PubMed Central journal article supplement (PMC4558674)
Supplement: supp_tpc.15.00048_TPC2015-00048-RAR1_Supplemental_DataRev.pdf [file supp_tpc.15.00048_TPC2015-00048-RAR1_Supplemental_DataRev.pdf]

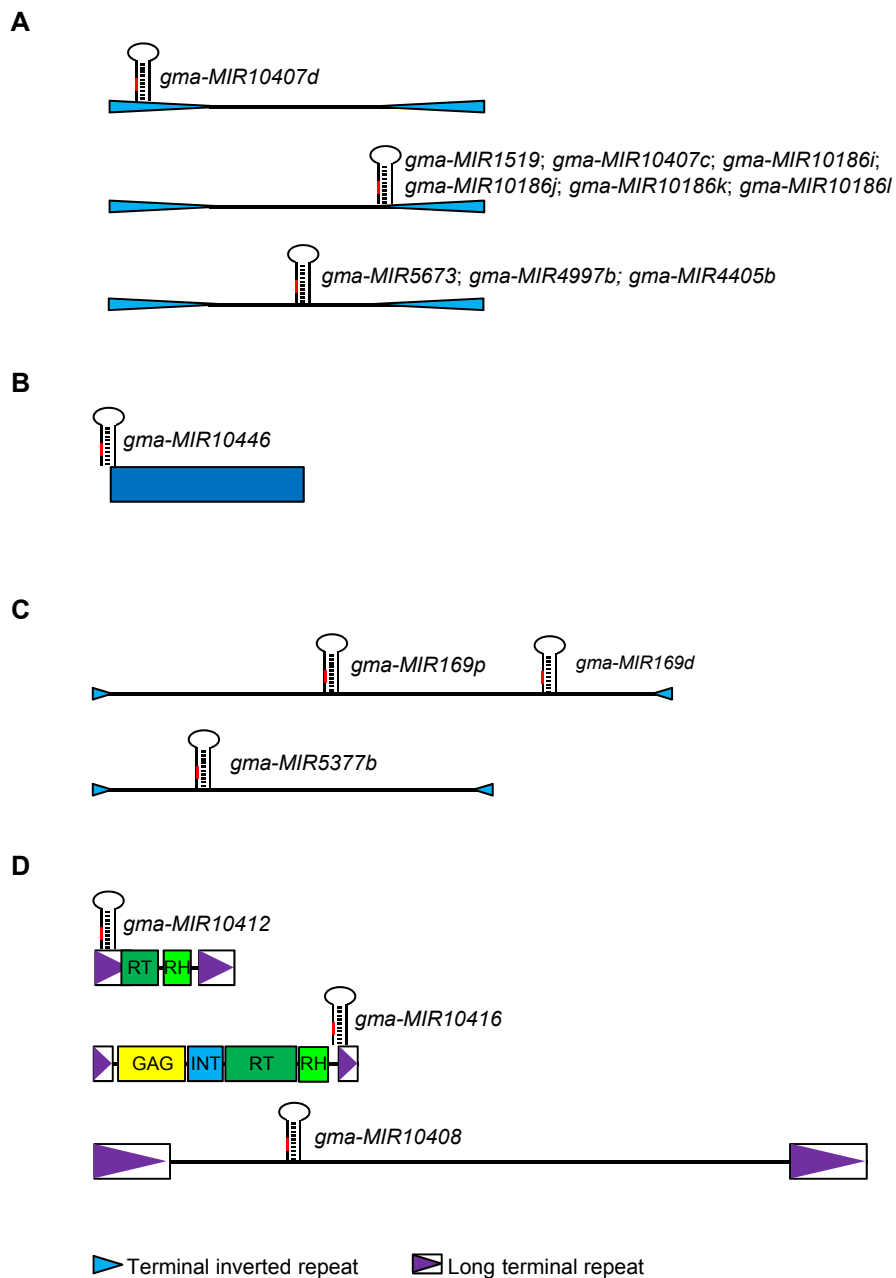

**Supplemental Figure 1.** Schematic Description of *MIRNA* Genes Co-located with Intact Transposable Elements.

- (A) An example in a mutator element.
- (B) An example in a Helitron.
- (C) An example in a CACTA element.
- (D) Examples in LTR retrotransposons.

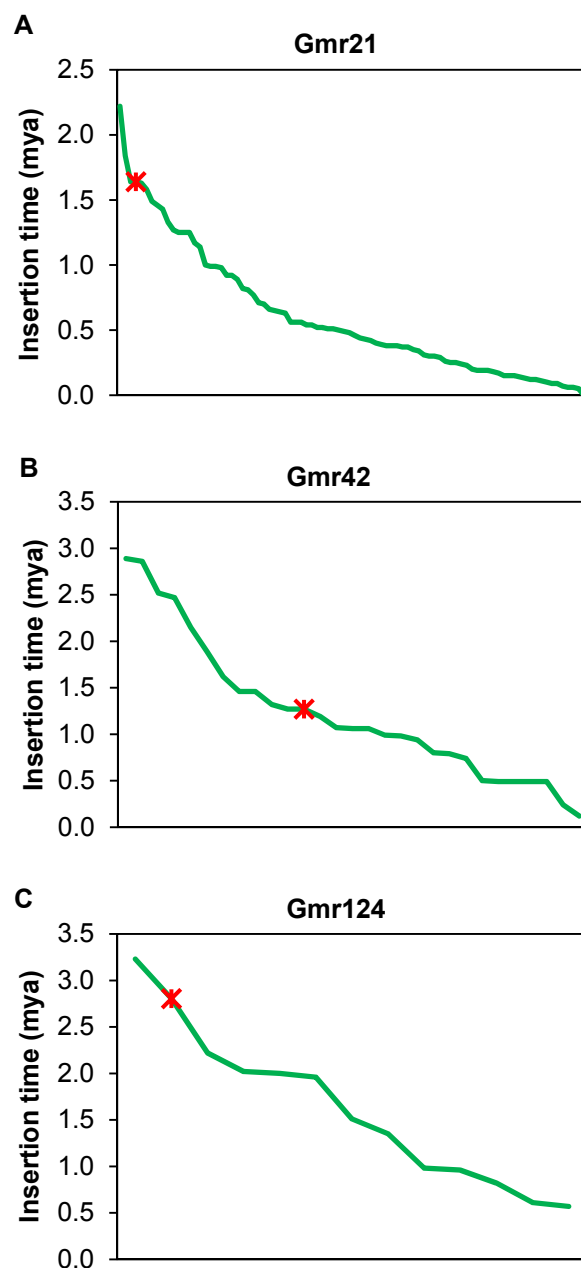

**Supplemental Figure 2.** Age Distribution of the Elements of Three LTR-RT Families *Gmr21*, *Gmr42* and *Gmr124*.

The x-axis represents all the intact LTR-RT elements in the family, and the y-axis represents the ages of the corresponding elements in the x-axis. The red star indicates that the element of the family contains *MIRNA* genes.

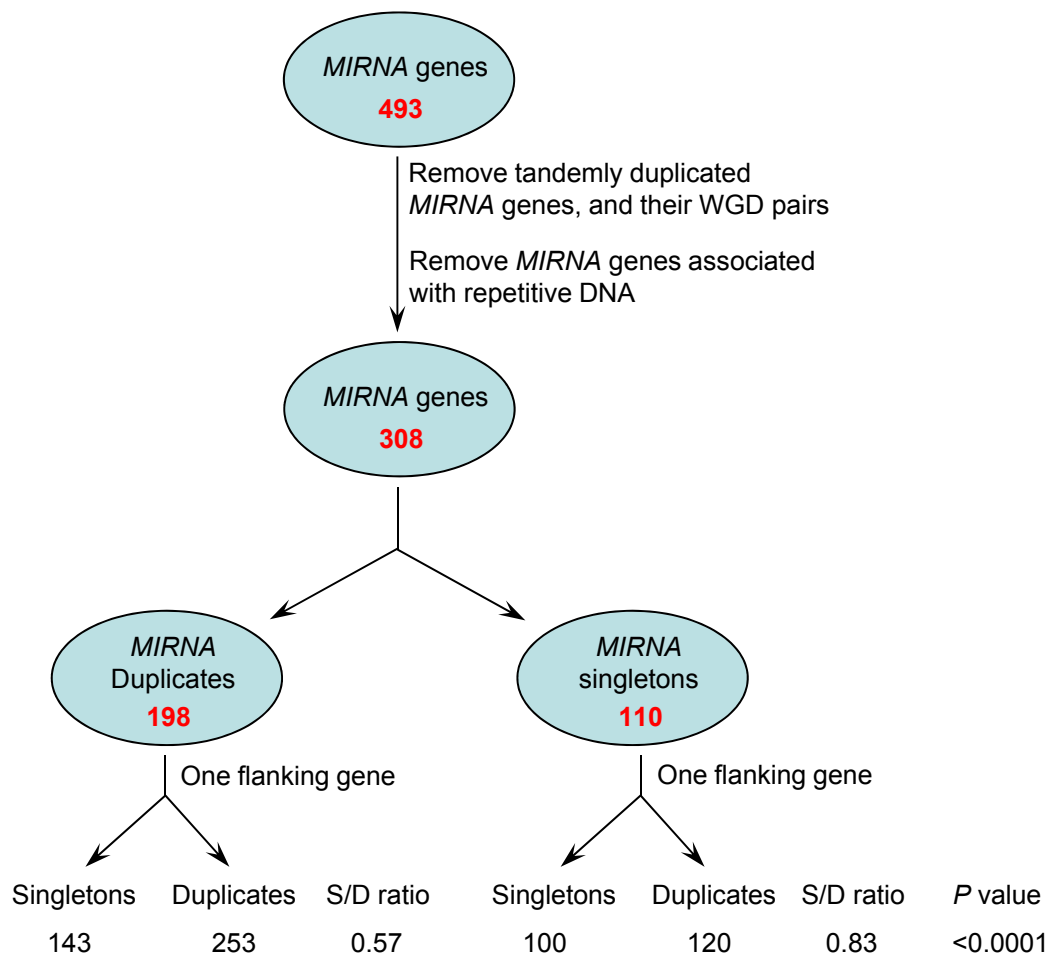

**Supplemental Figure 3.** Comparison of the Duplicate Status of One Flanking Genes of *MIRNA* Duplicates and *MIRNA* Singletons.

The statistical analysis was conducted using a  $\chi^2$  goodness-of-fit test.

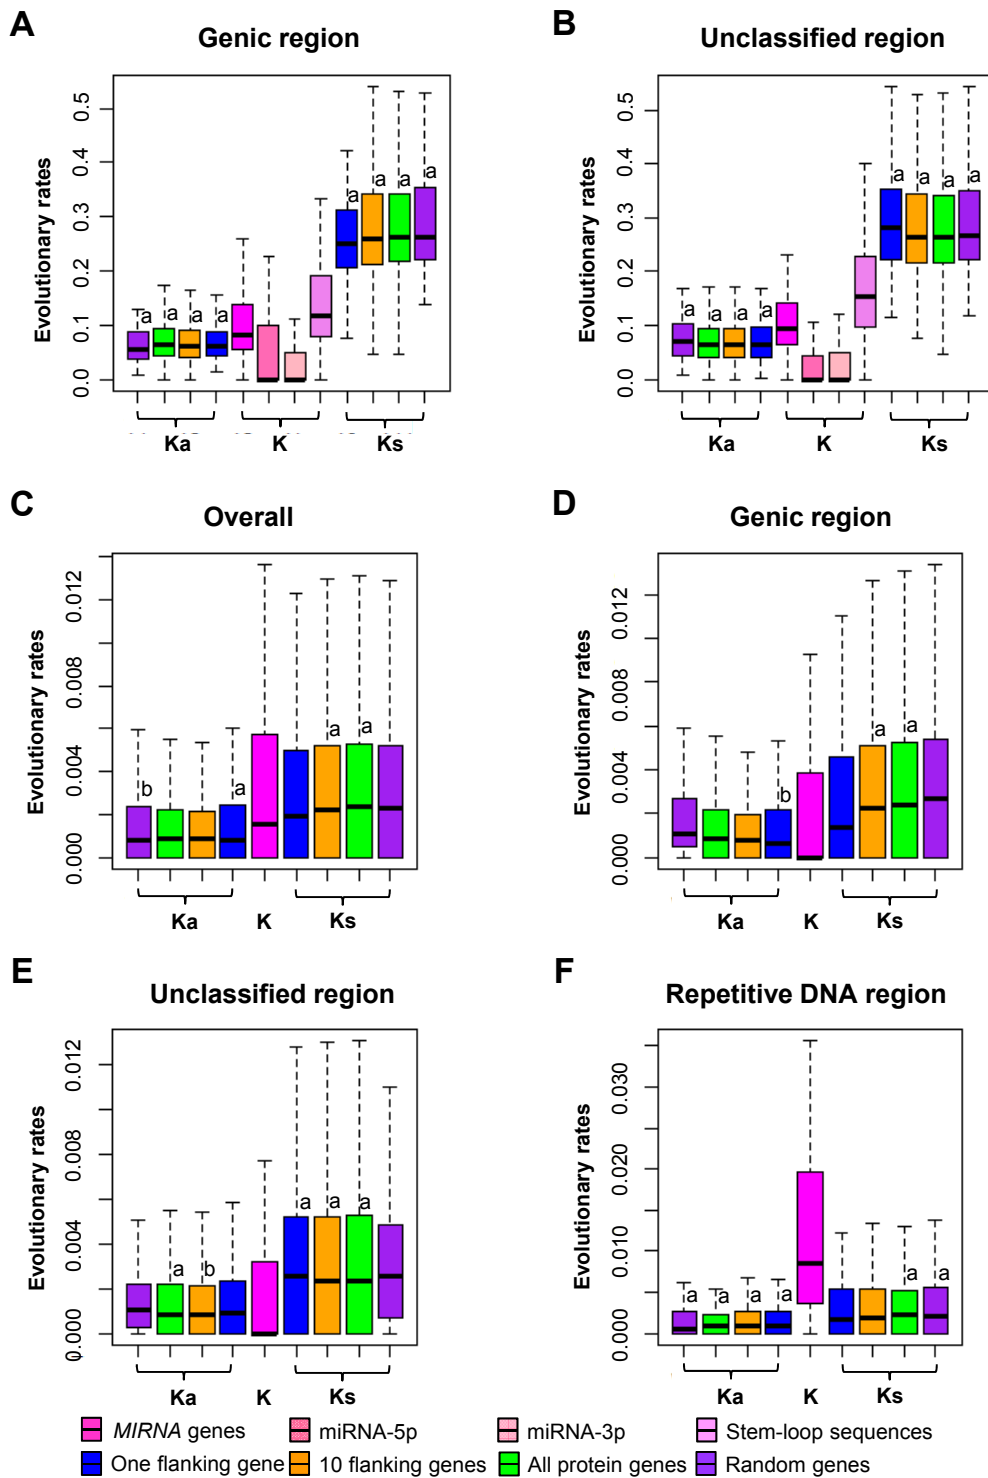

**Supplemental Figure 4.** Comparison of Evolutionary Rates between Different Categories of *MIRNA* Genes and PEGs in Soybean.

(A) and (B), Ka, Ks and K were calculated by pairwise comparisons between soybean and common bean.

(C), (D), (E) and (F), Ka, Ks and K were calculated by pairwise comparison among seven pan genomes of *Glycine soja*. The statistical analysis was conducted between each set of *MIRNA* genes and protein-encoding genes by Student's *t* test. The little "a" above each column indicates  $P < 0.01$ , and "b" indicates  $P < 0.05$ .

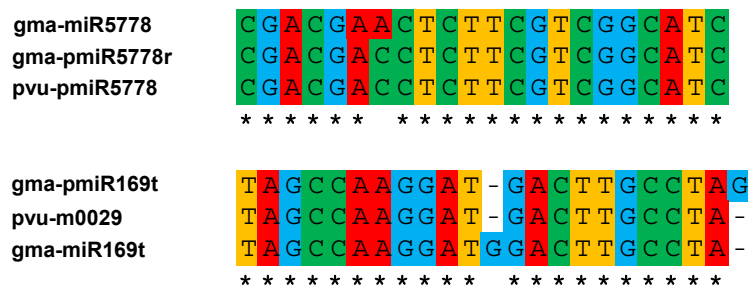

**Supplemental Figure 5.** Two Representative miRNAs May Have Gained Function via Mutation or Indels.

The abbreviation “pvu” indicates *Phaseolus vulgaris*. Colors indicate different nucleotides to facilitate comparisons across sequences.

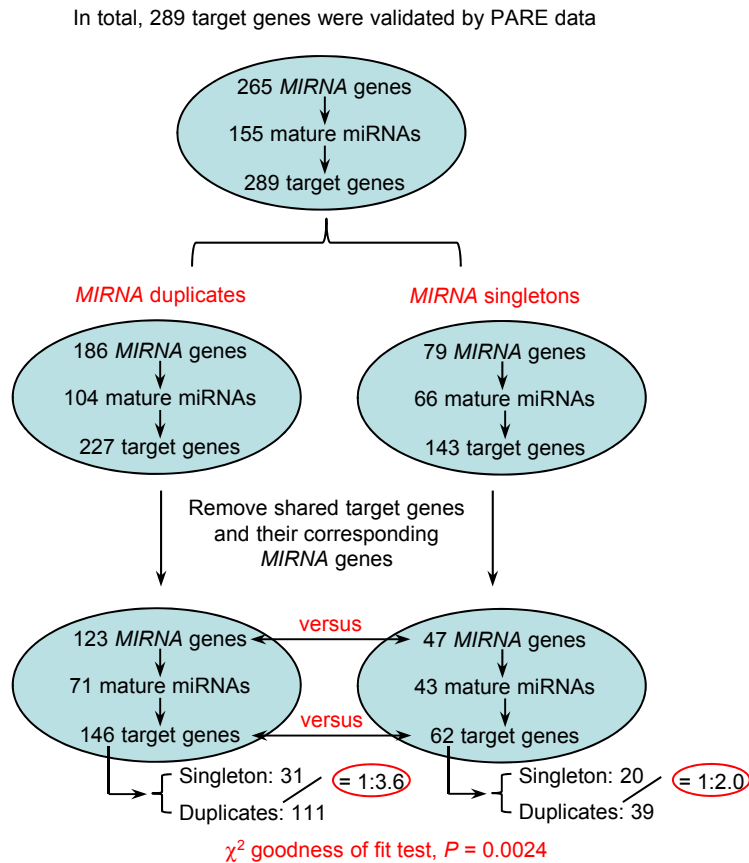

**Supplemental Figure 6.** Comparisons among *MIRNA* Duplicates and *MIRNA* Singletons, and among Their Target Genes.

In total, 289 miRNA targets that have been validated by using three parallel analysis of RNA ends (PARE) libraries (Song et al., 2011; Shamimuzzaman et al., 2012; Hu et al., 2013) were selected. These targets correspond to 265 *MIRNA* genes and 155 mature miRNAs. The 265 *MIRNA* genes were separated into two sets “*MIRNA* duplicates” and “*MIRNA* singletons” according to their duplication status. Shared targets and their corresponding *MIRNA* genes were further removed. The statistical analysis was conducted on the ratios of singletons to duplicates of the target genes of *MIRNA* duplicates and *MIRNA* singletons by  $\chi^2$  goodness of fit test.

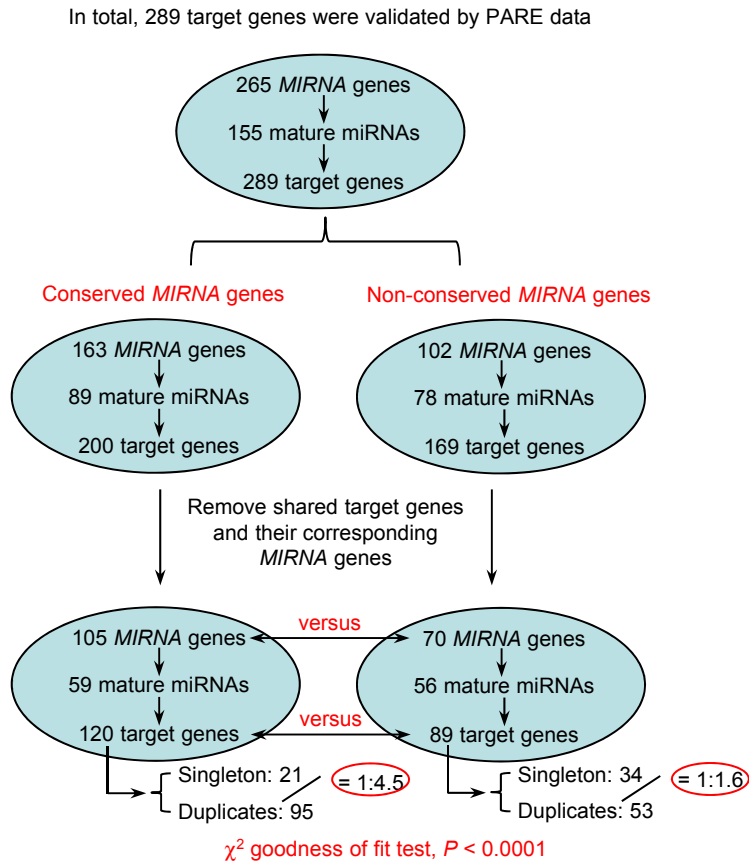

**Supplemental Figure 7.** Comparisons among Conserved and Non-conserved *MIRNA* Genes, and among Their Target Genes.

In total, 289 miRNA targets that have been validated by using three parallel analysis of RNA ends (PARE) libraries (Song et al., 2011; Shamimuzzaman et al., 2012; Hu et al., 2013) were selected. These targets correspond to 265 *MIRNA* genes and 155 mature miRNAs. The 265 *MIRNA* genes were separated into two sets “conserved *MIRNA* genes” and “non-conserved *MIRNA* genes”. Shared targets and their corresponding *MIRNA* genes were further removed. The statistical analysis was conducted on the ratios of singletons to duplicates of the target genes of conserved *MIRNA* genes and non-conserved *MIRNA* genes by  $\chi^2$  goodness of fit test.

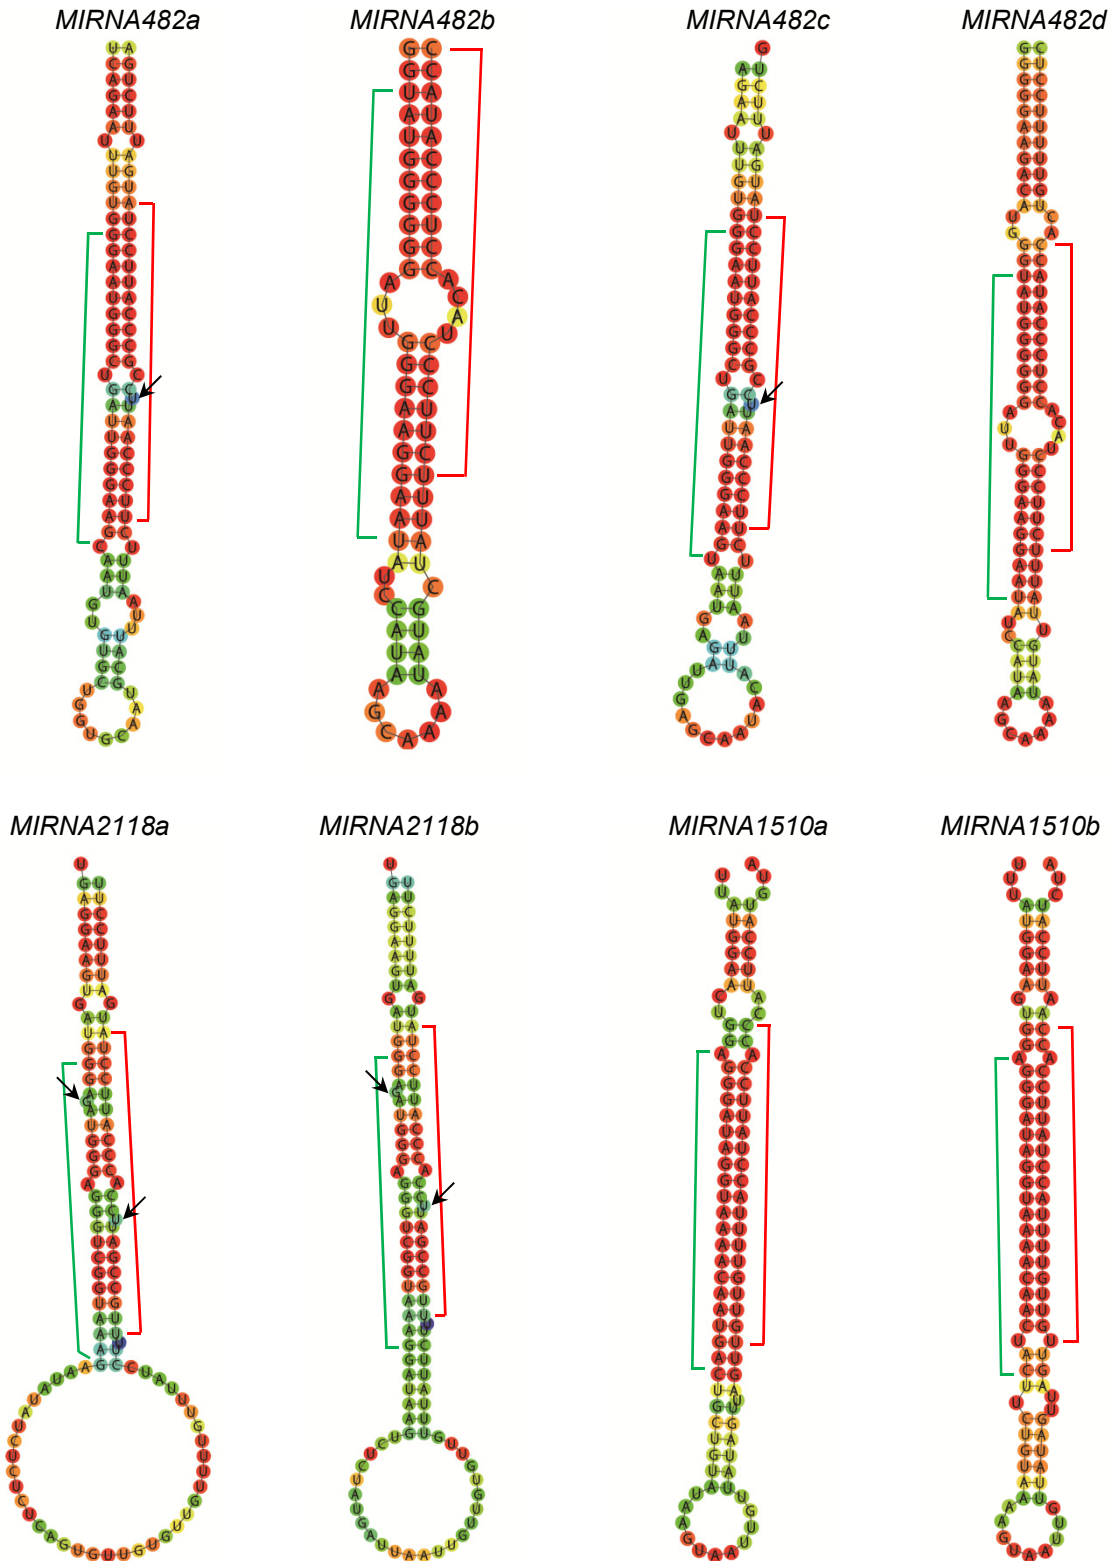

**Supplemental Figure 8.** Predicted Stem-loop Structures of Transcripts from *MIR482*, *MIR2118* and *MIR1510* in Soybean.

The secondary structures were predicted by CentroidFold, and the green and red lines indicate miRNA-5p and miRNA-3p. The bulges in miRNA-5p/miRNA-3p duplex regions are indicated by black arrows.



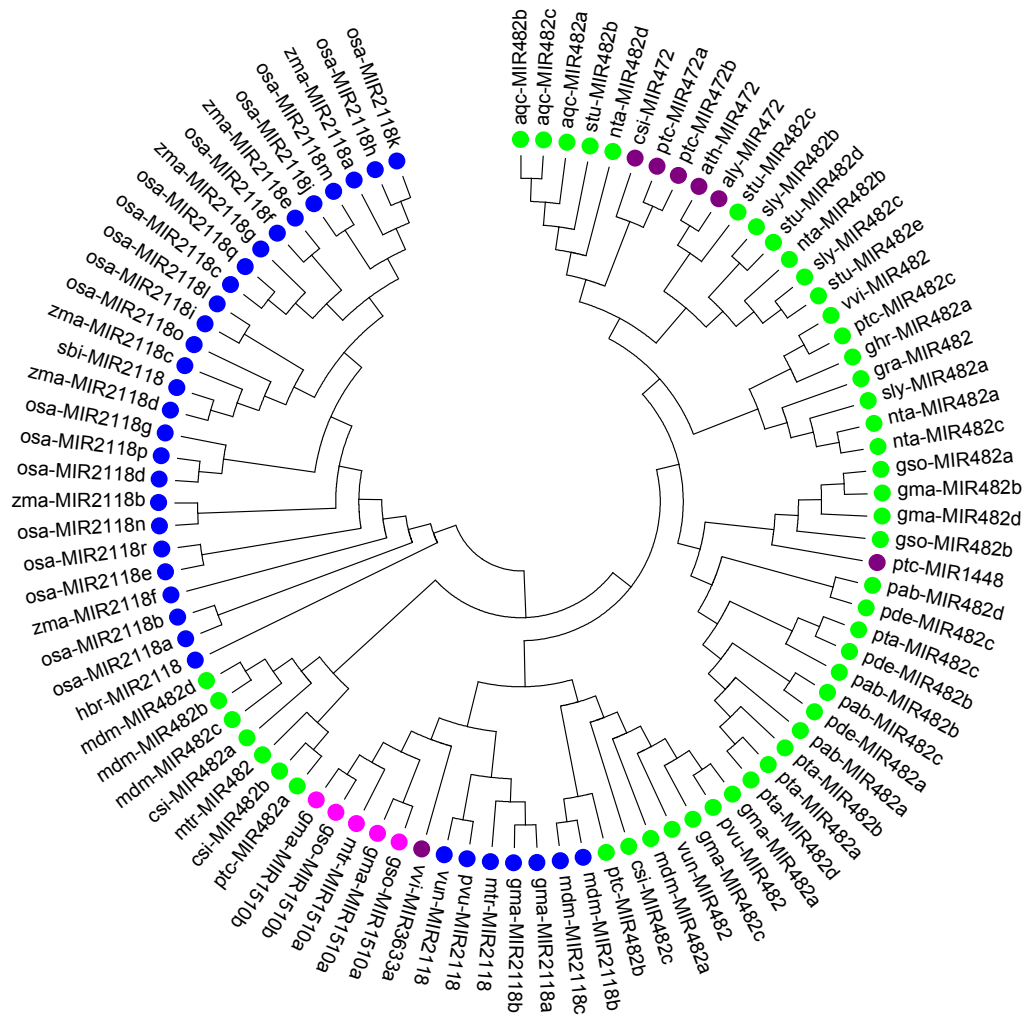

**Supplemental Figure 9.** Phylogenetic Relationship of *MIRNA* Genes Related to *MIR482*, *MIR2118* and *MIR1510*.

The miRNA-5p, miRNA-3p and their flanking upstream or downstream sequences were combined and used to construct the phylogenetic trees. For *MIR1510*, the combined sequence contains eight bp upstream sequences of miRNA-5p, miRNA-5p, miRNA-3p and eight bp downstream sequences of miRNA-3p. For *MIRNA482* and *MIR2118*, the combined sequence contains miRNA-5p, eight bp downstream sequences of miRNA-5p, eight bp upstream sequences of miRNA-3p and miRNA-3p. *MIR482*, *MIR2118*, *MIR1510* and other miRNA genes are indicated by green, blue, pink and purple dots, respectively.

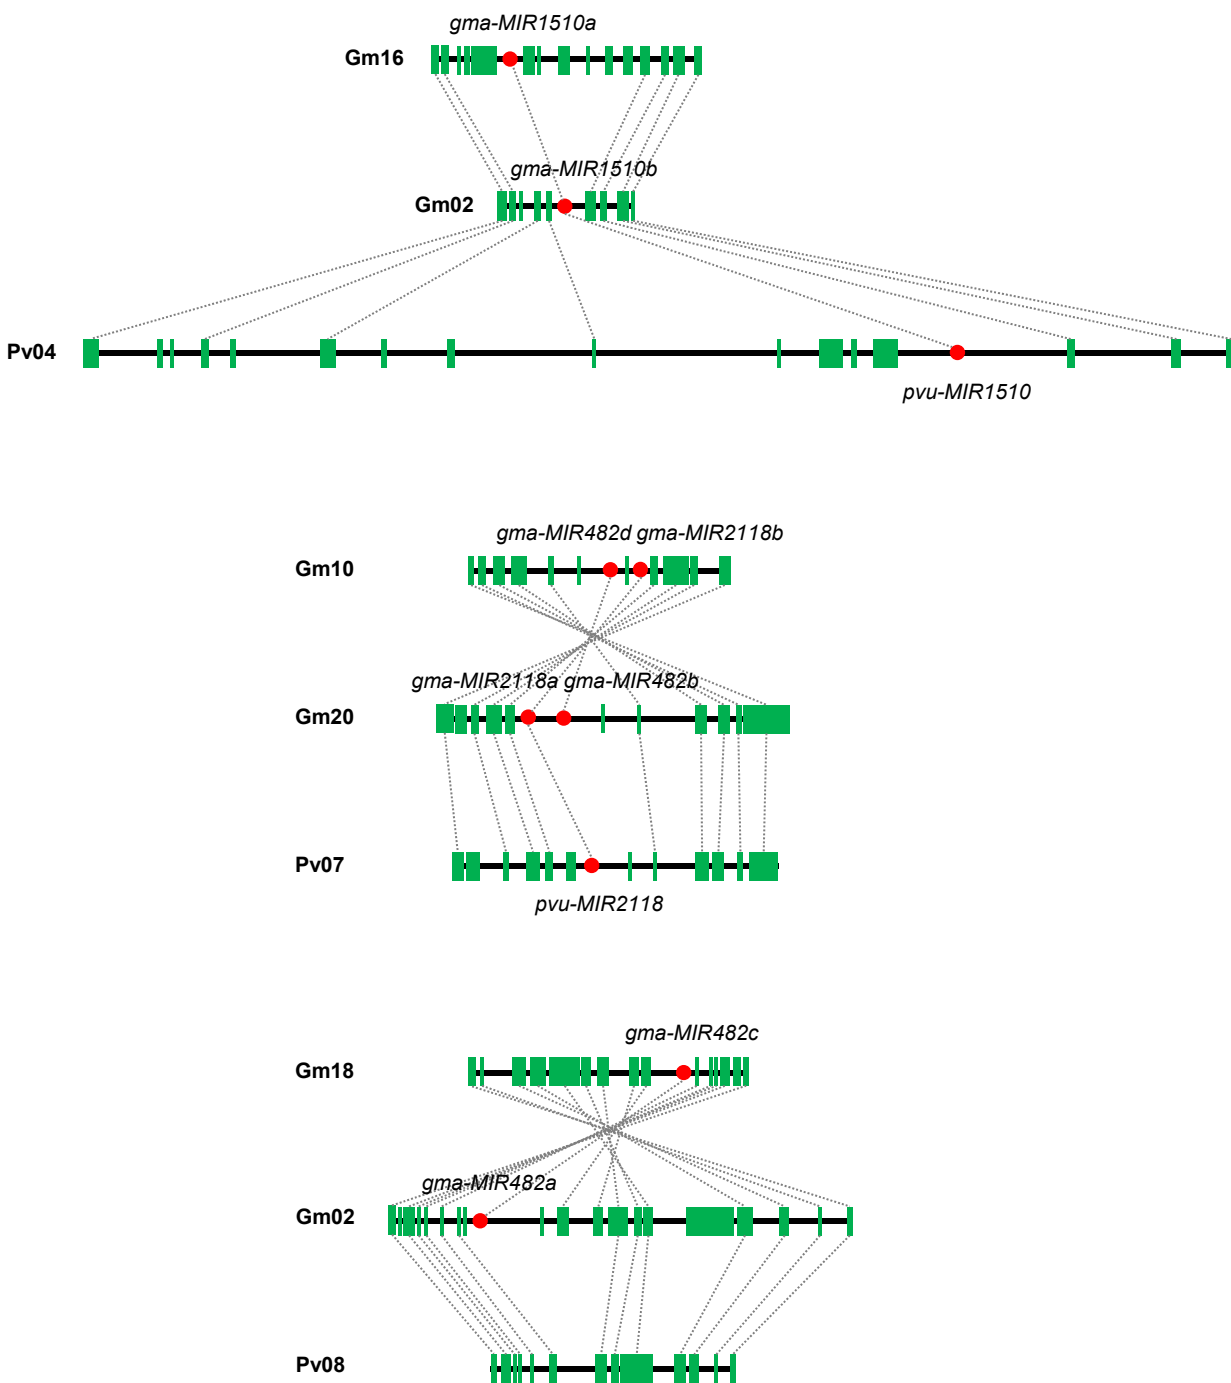

**Supplemental Figure 10.** Orthologous Relationships of *MIR1510*, *MIR2118* and *MIR482* between Common Bean and Soybean.

The green boxes indicate protein-encoding genes, and the red dots represent *MIRNA* genes.

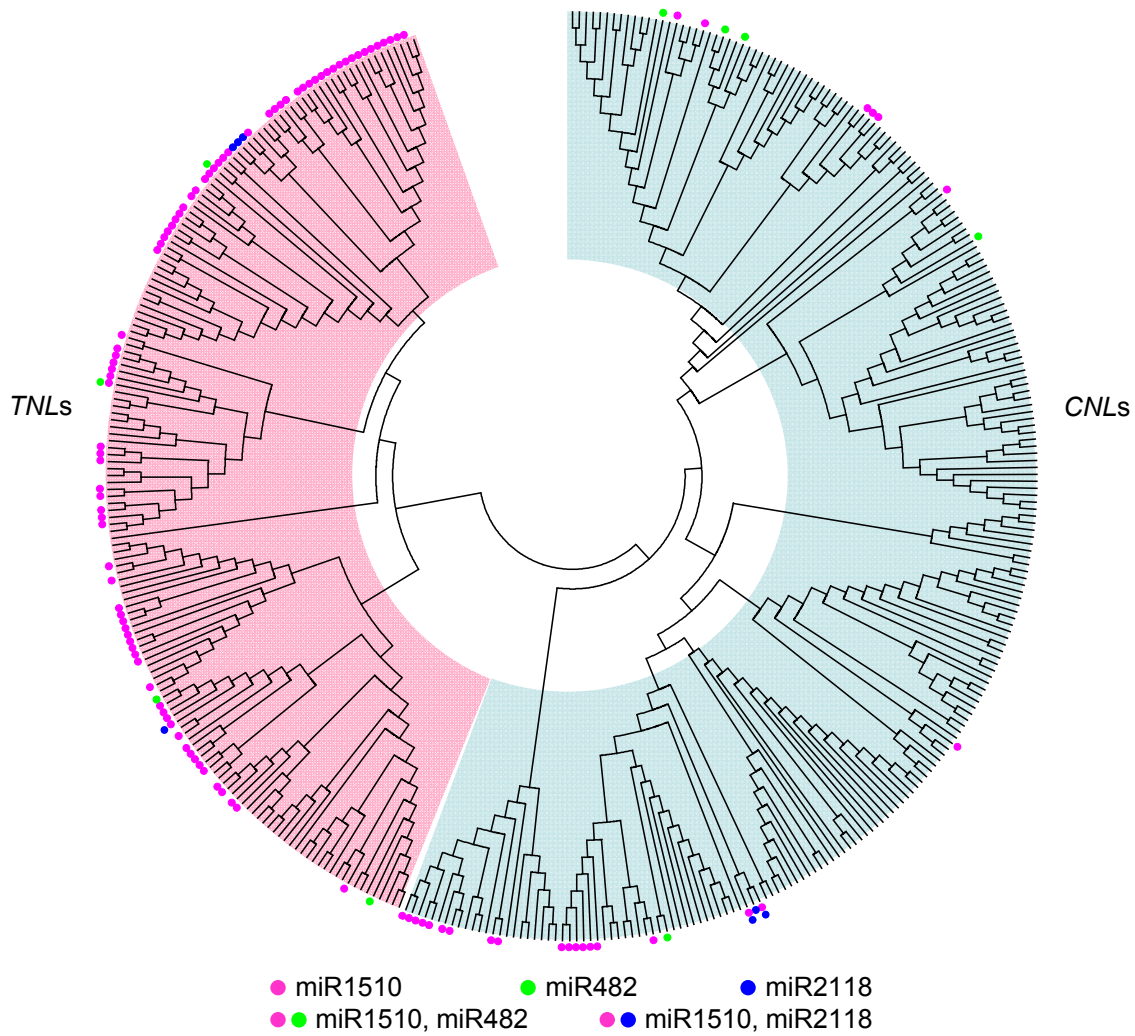

**Supplemental Figure 11.** Phylogenetic Analysis of *NB-LRR* Genes in Soybean.

The nucleotide sequences of the conserved P-loop domains described in Meyers et al., 2003 were used to construct the phylogenetic tree. The P-loop motifs of miR1510, miR482, and miR2118 predicted targets are indicated by pink, green and blue dots, respectively. Two dots mean the gene is both the predicted targets of two miRNAs. All others are the remaining *NB-LRR* genes in the soybean reference genome. The targets of miR1510, miR482 and miR2118 were predicted at or under the penalty score ( $\leq 5$ ). *TNLs*, *TIR-NB-LRRs*. *CNLs*, *CC-NB-LRRs*.

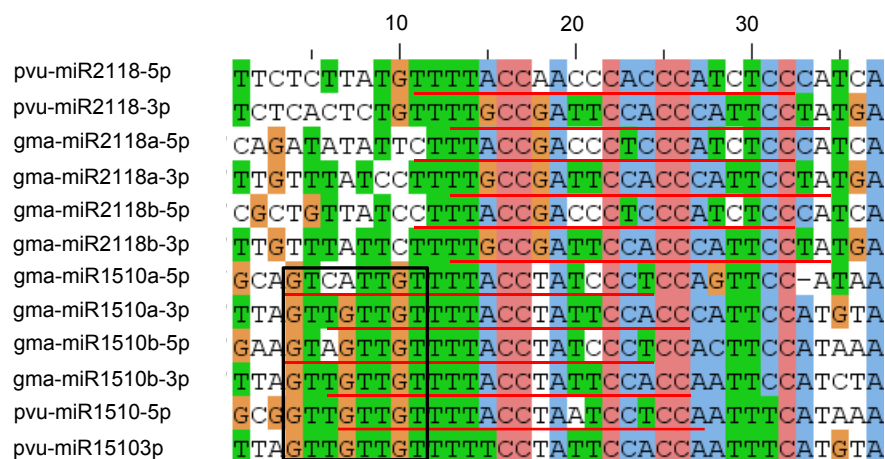

**Supplemental Figure 12.** Comparative Analysis of the miRNA-5p and miRNA-3p Regions of *MIR1510* and *MIR2118*.

The miRNA-5p and its flanking upstream and downstream sequences were extracted, reversed and complemented, and compared with miRNA-3p and its flanking upstream or downstream sequences. The red lines beneath each sequence indicate the miRNA-5p and miRNA-3p regions. The black box represents the region conserved in *MIR1510*, but diverged in *MIR2118*.



**Supplemental Data. Zhao et al. (2015). Plant Cell 10.1105/tpc.115.00048**

**Supplemental Table 1.** Orientations of *MIRNA* Genes Co-located with Protein-encoding Genes

|           | Same strand | Opposite strand | Total |
|-----------|-------------|-----------------|-------|
| Intron    | 39          | 9               | 48    |
| Exon      | 16          | 8               | 24    |
| 5' UTR    | 28          | 1               | 29    |
| 3' UTR    | 20          | 4               | 24    |
| Junction  | 34          | 3               | 37    |
| Total (%) | 137 (84.6%) | 25 (15.4%)      | 162   |

**Supplemental Data. Zhao et al. (2015). Plant Cell 10.1105/tpc.115.00048**

**Supplemental Table 2.** Description of *MIRNA* Genes with RNA-seq Reads Matched in the Soybean 28 Tissues

|                         | Total | No. of <i>MIRNA</i> genes matched by the RNA-seq reads |
|-------------------------|-------|--------------------------------------------------------|
| Intron                  | 48    | 26                                                     |
| Exon                    | 24    | ND                                                     |
| 5' UTR                  | 29    | ND                                                     |
| 3' UTR                  | 24    | ND                                                     |
| Multiple categories     | 37    | 1                                                      |
| Intergenic_5' UTR       | 4     | ND                                                     |
| 5' UTR_exon             | 13    | ND                                                     |
| 5' UTR_exon_3' UTR      | 1     | ND                                                     |
| 5' UTR_exon_intron      | 1     | ND                                                     |
| Exon_intron/Intron_exon | 6     | ND                                                     |
| Exon_intron_exon        | 1     | 1                                                      |
| Intron_5' UTR           | 1     | ND                                                     |
| Intron_exon_3' UTR      | 1     | ND                                                     |
| Exon_3' UTR             | 8     | ND                                                     |
| 3' UTR_intergenic       | 1     | ND                                                     |

ND, Not determined

**Supplemental Data. Zhao et al. (2015). Plant Cell 10.1105/tpc.115.00048**

**Supplemental Table 3.** Description of Soybean *MIRNA* Genes with Orthologs and Homologs in Common Bean

| Features       | Total <sup>a</sup> | Duplicates         |                        |                       | Singletons         |                        |                       |
|----------------|--------------------|--------------------|------------------------|-----------------------|--------------------|------------------------|-----------------------|
|                |                    | <i>MIRNA</i> genes | Orthologs <sup>b</sup> | Homologs <sup>c</sup> | <i>MIRNA</i> genes | Orthologs <sup>b</sup> | Homologs <sup>c</sup> |
| Genic          |                    |                    |                        |                       |                    |                        |                       |
| Intron         | 48                 | 11                 | 4                      | 1                     | 37                 | 1                      | 6                     |
| Exon           | 24                 | 19                 | 13                     | 1                     | 5                  | 0                      | 2                     |
| 5' UTR         | 29                 | 21                 | 15                     | 1                     | 9                  | 5                      | 0                     |
| 3' UTR         | 24                 | 16                 | 13                     | 1                     | 7                  | 1                      | 0                     |
| Junctions      | 37                 | 24                 | 22                     | 1                     | 13                 | 4                      | 2                     |
| Subtotal       | 162                | 91                 | 67                     | 5                     | 71                 | 11                     | 10                    |
| Unclassified   |                    |                    |                        |                       |                    |                        |                       |
| Subtotal       | 213                | 157                | 106                    | 16                    | 56                 | 14                     | 10                    |
| Repetitive DNA |                    |                    |                        |                       |                    |                        |                       |
| Subtotal       | 79                 | 11                 | 2                      | 0                     | 68                 | 3                      | 2                     |
| Total (%)      | 454                | 259                | 175                    | 21                    | 195                | 28                     | 22                    |

<sup>a</sup>Total number of expressable *MIRNA* genes in soybean.

<sup>b</sup>No. of orthologous *MIRNA* genes of soybean shared by common bean.

<sup>c</sup>No. of homologous *MIRNA* genes of soybean shared by common bean.



**Supplemental Data. Zhao et al. (2015). Plant Cell 10.1105/tpc.115.00048**

**Supplemental Table 4.** Statistics Analysis of Differential Ratios of Singletons to Duplicates of *MIRNA*s and Protein-Encoding Genes in Soybean

|                       | Singletons | Duplicates | S/D ratio <sup>a</sup> | <i>P</i> value <sup>b</sup> |
|-----------------------|------------|------------|------------------------|-----------------------------|
| <i>MIRNA</i> s        | 110        | 198        | 0.56:1                 | –                           |
| First flanking genes  | 243        | 373        | 0.65:1                 | 0.0528                      |
| Second flanking genes | 216        | 400        | 0.54:1                 | 0.7383                      |
| All protein genes     | 14964      | 31524      | 0.47:1                 | <0.0001                     |

<sup>a</sup>The ratio of Singletons to Duplicates.

<sup>b</sup>The statistic analysis was conducted on the ratios of singletons to duplicates between *MIRNA*s and each set of protein-encoding genes by  $\chi^2$  goodness of fit test. *MIRNA*s and their WGD pairs associated with tandem duplication and those located in repetitive DNAs were not included. Tandem duplicated protein-encoding genes were also excluded in this analysis.

**Supplemental Data. Zhao et al. (2015). Plant Cell 10.1105/tpc.115.00048**

**Supplemental Table 5.** Comparison of Evolutionary Rates among Different Regions of *MIRNA* Hairpins

| Comparison <sup>a</sup>      | Nucleotide divergence |                 | <i>P</i> <sup>c</sup> |
|------------------------------|-----------------------|-----------------|-----------------------|
|                              | Region1               | Region2         |                       |
| miRNA-5p vs. miRNA-3p        | 0.0317 ± 0.0571       | 0.0383 ± 0.0735 | 0.2937                |
| miRNA-5p vs. LS <sup>b</sup> | 0.0317 ± 0.0571       | 0.1300 ± 0.0768 | <0.0001               |
| miRNA-3p vs. LS <sup>b</sup> | 0.0383 ± 0.0735       | 0.1300 ± 0.0768 | <0.0001               |

<sup>a</sup>The nucleotide divergence were calculated by pairwise comparison between soybean *MIRNA* hairpins and their orthologs in the common bean genome.

<sup>b</sup>loop and other stem sequences.

<sup>c</sup>Student's paired *t* test.

**Supplemental Data. Zhao et al. (2015). Plant Cell 10.1105/tpc.115.00048**

**Supplemental Table 6.** Comparison of Evolutionary Rates of *MIRNA*s Involved and Not Involved in Tandem Duplication

**Do not remove *MIRNA* genes in repetitive DNA region**

| Comparison | Duplicates      | Singletons      | <i>P</i> <sup>a</sup> | Comparison | Tandem          | Non-tandem      | <i>P</i> <sup>a</sup> |
|------------|-----------------|-----------------|-----------------------|------------|-----------------|-----------------|-----------------------|
| Tandem     | 0.0016 ± 0.0025 | 0.0026 ± 0.0036 | 0.2569                | Duplicates | 0.0016 ± 0.0025 | 0.0025 ± 0.0049 | 0.0507                |
| Non-tandem | 0.0025 ± 0.0049 | 0.0109 ± 0.0149 | <0.0001               | Singletons | 0.0026 ± 0.0036 | 0.0109 ± 0.0149 | <0.0001               |

**Remove *MIRNA* genes in repetitive DNA region**

| Comparison | Duplicates      | Singletons      | <i>P</i> <sup>a</sup> | Comparison | Tandem          | Non-tandem      | <i>P</i> <sup>a</sup> |
|------------|-----------------|-----------------|-----------------------|------------|-----------------|-----------------|-----------------------|
| Tandem     | 0.0016 ± 0.0025 | 0.0023 ± 0.0029 | 0.2656                | Duplicates | 0.0016 ± 0.0025 | 0.0018 ± 0.0034 | 0.5655                |
| Non-tandem | 0.0018 ± 0.0034 | 0.0077 ± 0.0112 | <0.0001               | Singletons | 0.0023 ± 0.0029 | 0.0077 ± 0.0112 | <0.0001               |

<sup>a</sup>Student's *t* test.

**Supplemental Data. Zhao et al. (2015). Plant Cell 10.1105/tpc.115.00048**

**Supplemental Table 7.** Comparisons of the miRNA Expression Levels of *MIRNA* Genes Located in Different Regions

| Comparison | Genic region  | Unclassified region | <i>P</i> <sup>a</sup> |
|------------|---------------|---------------------|-----------------------|
| Overall    | 9402 ± 54636  | 4077 ± 22210        | 0.3898                |
| Duplicates | 19437 ± 78735 | 4889 ± 26484        | 0.2507                |
| Singletons | 412 ± 1311    | 2882 ± 13956        | 0.2838                |

| Comparison | Genic region  | Repetitive DNA region | <i>P</i> <sup>a</sup> |
|------------|---------------|-----------------------|-----------------------|
| Overall    | 9402 ± 54636  | 286 ± 813             | 0.1151                |
| Duplicates | 19437 ± 78735 | 263 ± 507             | 0.1178                |
| Singletons | 412 ± 1311    | 290 ± 857             | 0.6046                |

| Comparison | Unclassified region | Repetitive DNA region | <i>P</i> <sup>a</sup> |
|------------|---------------------|-----------------------|-----------------------|
| Overall    | 4077 ± 22210        | 286 ± 813             | 0.1017                |
| Duplicates | 4889 ± 26484        | 263 ± 507             | 0.1973                |
| Singletons | 2882 ± 13956        | 290 ± 857             | 0.2604                |

<sup>a</sup>Student's *t* test.

**Supplemental Data. Zhao et al. (2015). Plant Cell 10.1105/tpc.115.00048**

**Supplemental Table 8.** Comparison of the Expression Values of the 11 Duplicated miRNAs with Mutations

| miRNA        | Genomic location | TPM      | miRNA pair   | Genomic location | TPM       | Fold change |
|--------------|------------------|----------|--------------|------------------|-----------|-------------|
| gma-miR395h  | Arm              | 0        | gma-miR395m  | Arm              | 0         | -           |
| gma-miR1510a | Arm              | 14715.26 | gma-miR1510b | Arm              | 36885.09  | 2.51        |
| gma-miR482c  | Arm              | 2203.61  | gma-miR482a  | Arm              | 167177.08 | 75.87       |
| gma-miR1512a | Arm              | 3.05     | gma-miR1512b | Arm              | 98.37     | 32.25       |
| gma-miR169j  | Arm              | 3.53     | gma-miR169l  | Arm              | 4.65      | 1.32        |
| gma-miR1509b | Peri             | 211.52   | gma-miR1509a | Arm              | 1123.34   | 5.31        |
| gma-miR5770b | Arm              | 0.35     | gma-miR5770a | Peri             | 139.45    | 398.43      |
| gma-miR1514b | Arm              | 11.45    | gma-miR1514a | Arm              | 565.16    | 49.36       |
| gma-miR172k  | Arm              | 0        | gma-miR172b  | Arm              | 8.12      | -           |
| gma-miR319n  | Arm              | 50.56    | gma-miR319l  | Arm              | 1996.35   | 39.48       |
| gma-miR4415b | Peri             | 0        | gma-miR4415a | Arm              | 3.92      | -           |
